# Supplementary material for: PKCβ Facilitates Leukemogenesis in Chronic Lymphocytic Leukaemia by Promoting Constitutive BCR-Mediated Signalling
Source: MDPI journal article supplement (doi:10.3390/cancers14236006), 2022-12-06
Supplement: s1 [file s1]

# Supplementary Material: PKC $\beta$ Facilitates Leukemogenesis in Chronic Lymphocytic Leukaemia by Promoting Constitutive BCR-Mediated Signalling

Jodie Hay, Anuradha Tarafdar, Ailsa K. Holroyd, Hothri A. Moka, Karen M. Dunn, Alzahra Alshayeb, Bryony H. Lloyd, Jennifer Cassels, Natasha Malik, Ashfia F. Khan, IengFong Sou, Jamie Lees, Hassan N. B. Almuhanha, Nagesh Kalakonda, Joseph R. Slupsky and Alison M. Michie

**Supplementary Table S1.** CLL patient clinical characteristics.

| CLL ID | Treatment <sup>a</sup> | Sex | Binet Stage | ZAP-70 status <sup>b</sup> | Cytogenetics            |
|--------|------------------------|-----|-------------|----------------------------|-------------------------|
| 85     | Yes                    | F   | A           | ND                         | del(11q)                |
| 86     | No                     | F   | A           | pos                        | del(11q)                |
| 91     | Yes                    | M   | C           | pos                        | del(11q)                |
| 93     | Yes                    | M   | C           | pos                        | del(17p)                |
| 102    | Yes                    | F   | C           | pos                        | no del(11q) or del(17p) |
| 113    | Yes                    | F   | C           | high                       | del(17p)                |
| 144    | No                     | M   | B           | low                        | del(17p)                |
| 148    | Yes                    | M   | B           | low                        | del(11q)                |
| 150    | No                     | M   | A           | high                       | no del(11q) or del(17p) |
| 151    | No                     | M   | B           | ND                         | del(11q)                |

<sup>a</sup> If previously undergone treatment, it was not within three months of sample collection. <sup>b</sup> ZAP-70 analysis was conducted by immunohistochemistry in the regional haematology laboratory. ND – not determined.

**Supplementary Table S2.** Flow Cytometry Antibodies.

| Name                | Conjugation | Clone    | Company       |
|---------------------|-------------|----------|---------------|
| CD45                | Per-CP      | 30-F11   | BDBiosciences |
| CD19                | APC-Cy7     | 1D3      | BDBiosciences |
| B220                | PE          | RA3-6132 | BDBiosciences |
| CD5                 | APC         | 53-7.3   | BDBiosciences |
| CD5                 | BV510       | 53-7.3   | BioLegend     |
| CD23                | PE-Cy7      | B3B4     | BioLegend     |
| CXCR4               | BV510       | 2B11     | BDBiosciences |
| CD49d               | AF647       | R1-2     | BioLegend     |
| CD38                | APC-FIRE    | 90       | BioLegend     |
| CD38                | PE          | 90       | BDBiosciences |
| BTK <sup>Y223</sup> | AF647       | N35-86   | BDBiosciences |
| BTK <sup>Y551</sup> | AF647       | 24a/BTK  | BDBiosciences |
| Annexin V           | APC         | N/A      | BDBiosciences |

**Supplementary Table S3.** PCR primer sequences.

| Gene        | Forward sequence           | Reverse sequence           |
|-------------|----------------------------|----------------------------|
| <i>Btk</i>  | cac cag aaa gac aga ttc cg | cca tag cat tct tgg ctg tc |
| <i>Egr1</i> | gag atg atg ctg ctg agc aa | gtc gtt tgg ctg gga taa ct |
| <i>Tbp</i>  | gta ccc ttc acc aat gac tc | cag cca aga ttc acg gta ga |

All sequences are shown 5' - 3'.

**Supplementary Table S4.** ChIP primer sequences for the Sp1 binding sites on the mouse *prkcb* promoter region.

| SP1 binding sites   | Forward sequence              | Reverse sequence              |
|---------------------|-------------------------------|-------------------------------|
| <i>Prkcb</i> prom 1 | gcg ttg ggt cat tgc tgg at    | aca cac aca tac acg tac acc g |
| <i>Prkcb</i> prom 2 | cgg tgt acg tgt atg tgt gtg t | ccc tca ttg gca tga aac cc    |
| <i>Prkcb</i> prom 3 | tgt ctg tgt gtg tct ctg ct    | tgg tcc agc tgt gct tgg ca    |

**Supplementary Table S5:** List of antibodies used for Western blotting.

| Name                                          | Clone    | Dilution | 2 <sup>nd</sup> ary Ab | Company        |
|-----------------------------------------------|----------|----------|------------------------|----------------|
| <b>PKC<math>\alpha</math></b>                 | #2056    | 1:1000   | Rabbit                 | CST            |
| <b>pAKT<sup>S473</sup></b>                    | D9E      | 1:1000   | Rabbit                 | CST            |
| <b>AKT (pan)</b>                              | C67E7    | 1:1000   | Rabbit                 | CST            |
| <b>pS6<sup>S235/S236</sup></b>                | D57.2.2E | 1:1000   | Rabbit                 | CST            |
| <b>S6</b>                                     | 54D2     | 1:1000   | Mouse                  | CST            |
| <b>PKC<math>\beta</math>II</b>                | C-18     | 1:1000   | Rabbit                 | Santa-Cruz     |
| <b>SP1</b>                                    | ab227383 | 1:500    | Rabbit                 | Abcam          |
| <b>LYN</b>                                    | #2732    | 1:1000   | Mouse                  | CST            |
| <b>LCK</b>                                    | 28/Lck   | 1:1000   | Mouse                  | BD Biosciences |
| <b>EGR1</b>                                   | 44D5     | 1:1000   | Rabbit                 | CST            |
| <b>SYK</b>                                    | #2712    | 1:1000   | Rabbit                 | CST            |
| <b>c-MYC<sup>S62</sup></b>                    | EPR17924 | 1:1000   | Rabbit                 | Abcam          |
| <b>c-Myc</b>                                  | #9402    | 1:1000   | Rabbit                 | CST            |
| <b>GAPDH</b>                                  | D16H11   | 1:1000   | Rabbit                 | CST            |
| <b><math>\alpha</math>-mouse IgG, HRP Ab</b>  | #7076    | 1:10000  | Horse                  | CST            |
| <b><math>\alpha</math>-rabbit IgG, HRP Ab</b> | #7074    | 1:10000  | Goat                   | CST            |

List of antibodies (Ab) and their dilutions used in TBS-T with milk or BSA. All antibodies were purchased from Cell Signalling Technologies (CST), Santa-Cruz, BD Biosciences or Abcam.

**Supplementary Table S6:** Gene modulation in primary CLL cells upon treatment with mithramycin. CLL cells ( $1 \times 10^7$  cells) from 4 patient samples were purified from whole blood and then incubated  $\pm$  200 nM mithramycin. Following treatment, RNA was harvested from the cells, assessed for quality, and subjected to gene expression analysis using a Whole human genome (4x44K) microarray kit (Agilent Technologies). The effect of mithramycin treatment is recorded as fold change in gene expression together with the adjusted P value for the 4 patient samples analyzed. The microarray data are available at the GEO repository (GSE210348).

| Gene name    | Fold change | Adjusted P value |
|--------------|-------------|------------------|
| <b>PRKCB</b> | -3.70       | p=0.00022        |
| <b>BCL2</b>  | -1.92       | p=0.00031        |
| <b>LEF1</b>  | -1.47       | p=0.00032        |
| <b>BLNK</b>  | -1.09       | p=0.0020         |
| <b>VEGFA</b> | -0.561      | p=0.011          |
| <b>SP1</b>   | -0.529      | P=0.041          |

**Supplementary Table S7.** Gene ontology analysis of the significantly altered genes between late co-culture PKC $\alpha$ -KR vs. MIEV cells identifies the most enriched group of pathways. Fold change  $\pm 1.2$  and p-value  $< 0.05$ .

| Function              | Type               | Enrichment Score | Enrichment p-value | % genes in group that are present | # genes in list, in group | # genes not in list, in group | GO ID | Genes in Group                                                                                                                                                                                                                                                                                                                                                                                                                                                                                                                                                                                                                                                                                                                                                                                                                                                                                                                                                                                                                                                                                                                                                                                                                                                                                                                                                                                                                                                                                                                                                                                                                                                                                                                                                                                                                                                                                                                                                                                                         |
|-----------------------|--------------------|------------------|--------------------|-----------------------------------|---------------------------|-------------------------------|-------|------------------------------------------------------------------------------------------------------------------------------------------------------------------------------------------------------------------------------------------------------------------------------------------------------------------------------------------------------------------------------------------------------------------------------------------------------------------------------------------------------------------------------------------------------------------------------------------------------------------------------------------------------------------------------------------------------------------------------------------------------------------------------------------------------------------------------------------------------------------------------------------------------------------------------------------------------------------------------------------------------------------------------------------------------------------------------------------------------------------------------------------------------------------------------------------------------------------------------------------------------------------------------------------------------------------------------------------------------------------------------------------------------------------------------------------------------------------------------------------------------------------------------------------------------------------------------------------------------------------------------------------------------------------------------------------------------------------------------------------------------------------------------------------------------------------------------------------------------------------------------------------------------------------------------------------------------------------------------------------------------------------------|
| lymphocyte activation | biological process | 50.6836          | 9.74E-23           | 28                                | 115                       | 297                           | 46649 | Chd7; Ptk2b; Itgal; Nfam1; Cdh17; Itgam; Chd7; Fcrl1; Polm; Chd7; Gpr183; Clcf1; Lyl1; Icosl; Chd7; Lat2; Chd7; Gja1; Cr2; Chd7; Chd7; Cd180; Cd86; Coro1a; Chd7; Flt3l; Spi1; Chd7; Msn; Cd74; Atad5; Notch2; Zbtb1; Hhex; Bank1; Ms4a1; St3gal; Chd7; Chd7; Itgb2; Chd7; Lcp1; Chd7; Gba; Chd7; Ptprc; Bcl3; Chd7; Lck; Chd7; Impdh1; Hdac5; Chd7; Chd7; Mpzl2; Chd7; Stat5b; Icam1; Bcl2a1; Chd7; Exo1; Ezh2; Slamf6; Chd7; Satb1; Gm1327; Gm1327; Gm1327; Irf8; Zbtb7b; Chd7; Chd7; Chd7; Plcl2; Kit; Gm1327; P2rx7; Mef2c; Nbn; Cmtm7; Lilrb4; Ptprj; Fcer1g; Ifnz; Itm2a; Egr1; Sema4a; Fgl2; Gpr18; Chd7; Nfatc1; Rhoh; Sox4; Adam17; Chd7; Klrb1c; Traf3i; Ccr6; Bcl6; Nedd4; Lig4; Atp7a; Nlrc3; Gm1327; Ptpn2; Tox; Jak3; Chd7; Dock8; Ly6d; Gapt; Fzd9; Chd7; Blnk; Rasgrp; Blm; Tpd52; Swap70; Cd2; Spiib; Fyn; Tnfaip; Chd7; Msh2; Ada; Il15; Cd1d1; Il12a; Cdk6; Cd79a; Slc11a; Hdac9; Foxp1; Pik3r1; Psap; Tcf3; Cxcr5; Ercc1; Ccr9; Batf; Hmgb1; Cd19; Chd7; Gimap1                                                                                                                                                                                                                                                                                                                                                                                                                                                                                                                                                                                                                                                                                                                                                                                                                                                                                                                                                                                                                                    |
| immune response       | biological process | 47.274           | 2.95E-21           | 19                                | 251                       | 1056                          | 6955  | Klrd1; Ifitm1; Ptk2b; Itgal; Hck; Nfam1; Tlr1; Cdh17; Cntl1; Ighv1-62-3; Cfp; Cd37; Tnfaip8l2; Cyba; Ighv1-72; Ltb; Tgfbr3; Yes1; Rnase6; Ang; Gpr183; Tnk2; Dab2ip; H2-Aa; Icosl; H2-DMb1; Ptpn6; Lcp2; Il4ra; Ighv1-69; Lyz2; Lat2; Ccr2; Ighv1-52; Lgals3; Prkd2; Nlrp3; Ifngr2; Tac4; Cst7; Cr2; H2-Ab1; Ccl9; Ighv1-55; Cd180; Tagap; Ighv1-61; Pycard; Pld4; Tnfrsf1a; Cd86; Wfdc17; Coro1a; Clec5a; Tlr6; Trav15d-1-dv6d-1; Trav15d-1-dv6d-1; H2-DMA; Lat; Pdcd1lg2; Ly86; Spi1; Cd74; Ifitm2; Atad5; Tmf1; Notch2; Ctss; Tlr9; Zbtb1; Ms4a1; St3gal1; Irf5; Nckap1l; Tnf; Skap1; Cd68; Ccdc88b; Lcp1; Slc15a3; Lta; Trem1; Myo1f; Ccl3; Ptprc; Bcl3; Nlrp3; Cybb; Ifngr1; Tlr2; Prkce; Ssc5d; Mpeg1; Tnfrsf13c; C5ar1; Rgcc; Ccr5; Ccr5; Lck; Bcl6b; Ctsh; Ccl7; Ccl6; Naip2; Casp4; Btla; Igf1r; Tlr13; H2-Eb1; Fes; P2ry14; Fcgr3; Lyn; Tyrobp; Colecl12; Icam1; Bcl2a1d; Rnf125; Exo1; Lyz1; Nlrc4; Slpi; Slamf6; Skp2; Gm13276; Gm13277; Gm13275; Irf8; Pmp22; H2-Eb2; Hmgb3; Ctst; Gsdmd; Pnp2; Plscr1; Trav15-2-dv6-2; Btk; Plcl2; Fcgr1; Kit; Gm13272; P2rx7; Siglec; Tnfrsf11a; Clec2i; Adgre1; Stard7; Mef2c; Fcgr2b; Cd84; Hmgb3; Nbn; Dennd1b; Lilrb4a; Ccr1; Ticam2; Igkv6-15; Cd274; Fcer1g; Vav3; Thy1; Ifnz; Tnfsf10; Ifnar2; Slamf9; Itm2a; Ccr7; Naip6; Ighv1-74; Sema4a; Fgl2; H2-Oa; Trav6d-7; Trav6d-7; Erap1; Naip5; Trf; C3ar1; Spn; Pde4d; Ccl2; Il1rap; Casp1; Adam17; Trim59; Pld3; Pnp; Igkv4-74; Traf3ip2; Ccr6; Src; Bcl6; Ackr2; Clec4n; Igkv4-62; Il2ra; Igkv5-45; Nedd4; Ackr3; Apobec3; Lig4; Atp7a; Gm13271; Pstpip1; Ifi205; Igkv3-9; App; Tnfsf11; Jak3; Ighv5-12-4; Ighv1-58; Ifitm3; Cxcr2; Igkv19-93; Cnpy3; Csf1r; Gas6; Il10rb; Igkv1-117; Rel; Gapt; Ighv3-5; Ppp1r14b; Il5ra; Igkv12-44; Btl2; Trim28; Crlf2; Chid1; Blnk; Rasgrp1; Irf3; Wfdc10; Igkv4-61; Wfdc5; Fgr; Igkv4-70; Igkv6-13; Igkv10-94; Swap70; Il27ra; Mov10; Alcam; Hmgb2; Igkv9-120; H2-Ob; Fyn; Ighv1-63; Tnfaip3; Igkv12-46; Tlr7; Msh2; Igkv4-59; Ada; Il15; Cd1d1; Alpk1; Il12a; Agbl5; Endou; |

|                                                     |                    |         |           |    |    |     |       |                                                                                                                                                                                                                                                                                                                                                                                                                                                                                                                                                                                                                                                          |
|-----------------------------------------------------|--------------------|---------|-----------|----|----|-----|-------|----------------------------------------------------------------------------------------------------------------------------------------------------------------------------------------------------------------------------------------------------------------------------------------------------------------------------------------------------------------------------------------------------------------------------------------------------------------------------------------------------------------------------------------------------------------------------------------------------------------------------------------------------------|
|                                                     |                    |         |           |    |    |     |       | Map3k5; Rps19; Lgr4; Igkv6-32; Ptk2; Cd79a; Igkv4-86; Slc11a1; Ccl22; Trem3; Igkv5-48; Foxp1; Igkv10-96; Gpam; Tnfrsf8; Stat3; Tnfrsf14; Zc3h12a; Trim32; Cxcr5; Ercc1; Slc15a4; Samhd1; Ccr9; Batf; Hmgb1; Zap70; Aim2; Ighv13-2; Cd19; Igkv2-109; Irak4; Igkv8-21; Mfsd6; Igkv8-30                                                                                                                                                                                                                                                                                                                                                                     |
| production of molecular mediator of immune response | biological process | 30.7882 | 4.25E-14  | 36 | 46 | 83  | 2440  | H2-Aa; H2-DMb1; H2-Ab1; Trav15d-1-dv6d-1; Trav15d-1-dv6d-1; H2-DMA; Atad5; Trem1; H2-Eb1; H2-Eb2; Trav15-2-dv6-2; Stard7; Igkv6-15; Slamf9; Itm2a; Fgl2; H2-Oa; Trav6d-7; Trav6d-7; Igkv4-74; Traf3ip2; Igkv4-62; Igkv5-45; Igkv3-9; Igkv19-93; Gas6; Igkv1-117; Gapt; Igkv12-44; Crlf2; Igkv4-61; Igkv4-70; Igkv6-13; Igkv10-94; Igkv9-120; H2-Ob; Igkv12-46; Igkv4-59; Il12a; Igkv6-32; Igkv4-86; Slc11a1; Trem3; Igkv5-48; Igkv10-96; Igkv2-109; Igkv8-21; Igkv8-30                                                                                                                                                                                   |
| leukocyte migration                                 | biological process | 22.3821 | 1.90E-10  | 26 | 54 | 150 | 50900 | Asb2; Mmp9; Itgal; Itgam; Sell; Gpr183; Cnr2; Itga4; Ccr2; Lgals3; Ccl9; Coro1a; Msn; Pecam1; Itgb2; Nckap1l; Tnf; Cklf; Gba; Trem1; Ccl3; C5ar1; Wdr1; Ccl7; Ccl6; Arhgef5; Fcgr3; Stat5b; Icam1; Kit; Ccr1; Spp1; Fcer1g; Vav3; Slamf9; Ccr7; Itga9; Pde4d; Ccl2; Ccr6; Tnfsf11; Itgb7; Cxcr2; Dock8; Gas6; Arhgef5; Ano6; Selplg; Rps19; Ccl22; Trem3; Ninj1; S1pr1; Cxcr5; Irak4                                                                                                                                                                                                                                                                     |
| immune effector process                             | biological process | 19.6089 | 3.05E-09  | 20 | 85 | 331 | 2252  | Klrd1; Ptk2b; Itgal; Cdh17; Ighv1-62-3; Cfp; Ighv1-72; Gpr183; Icosl; Ptpn6; Il4ra; Ighv1-69; Lat2; Ighv1-52; Tac4; Cr2; Ighv1-55; Cd180; Ighv1-61; Pycard; Coro1a; H2-DMA; Lat; Spi1; Cd74; Atad5; Notch2; St3gal1; Lcp1; Trem1; Myo1f; Bcl3; Prkce; Rgcc; Wdr1; Ctsh; Fcgr3; Tyrobp; Icam1; Exo1; Gm13276; Gm13277; Gm13275; Irf8; Plcl2; Fcgr1; Kit; Gm13272; Stard7; Fcgr2b; Nbn; Fcer1g; Ifnz; Slamf9; Itm2a; Ighv1-74; Sema4a; Fgl2; Traf3ip2; Ccr6; Lig4; Atp7a; Gm13271; App; Ighv5-12-4; Ighv1-58; Gapt; Ighv3-5; Crlf2; Rasgrp1; Swap70; Ighv1-63; Tnfaip3; Msh2; Ada; Il12a; Slc11a1; Trem3; Foxp1; Ercc1; Batf; Hmgb1; Ighv13-2; Cd19; Irak4 |
| leukocyte homeostasis                               | biological process | 16.5018 | 6.81E-08  | 33 | 27 | 56  | 1776  | Gpr174; Gpr183; Mpl; Casp3; Coro1a; Lat; Sh2b3; Gimap3; Nckap1l; Tnfrsf13c; Lyn; Stat5b; Bcl2a1a; P2rx7; Mef2c; Lilrb4a; Ikbkb; Ccl2; Traf3ip2; Il2ra; Jak3; Gapt; Tnfaip3; Men1; Bcl2l11; Slc40a1; Slc15a4                                                                                                                                                                                                                                                                                                                                                                                                                                              |
| antigen processing & presentation                   | biological process | 11.2912 | 1.25E-05  | 27 | 25 | 69  | 19882 | H2-Aa; H2-DMb1; Ifi30; H2-Ab1; H2-DMA; Cd74; Ctss; Gba; H2-Eb1; Fcgr3; Icam1; H2-Eb2; Ctss; Fcgr1; Fcgr2b; Fcer1g; H2-Oa; Erap1; Rab4a; H2-Ob; Cd1d1; Ide; Slc11a1; Psap; Mfsd6                                                                                                                                                                                                                                                                                                                                                                                                                                                                          |
| somatic diversification of immune receptors         | biological process | 11.0128 | 1.65E-05  | 34 | 16 | 31  | 2200  | Polm; Icosl; Atad5; Exo1; Ezh2; Nbn; Ccr6; Lig4; Swap70; Msh2; Foxp1; Tcf3; Ercc1; Samhd1; Batf; Hmgb1                                                                                                                                                                                                                                                                                                                                                                                                                                                                                                                                                   |
| activation of immune response                       | biological process | 9.22096 | 9.89E-05  | 18 | 55 | 253 | 2253  | Klrd1; Nfam1; Ighv1-62-3; Cfp; Ighv1-72; Icosl; Ptpn6; Lcp2; Ighv1-69; Lat2; Ighv1-52; Prkd2; Cr2; Ighv1-55; Ighv1-61; Pycard; Tlr9; Ms4a1; Nckap1l; Skap1; Ptpnc; Tlr2; C5ar1; Rgcc; Lck; Lyn; Tyrobp; Bcl2a1d; Nlr4; Btk; Clec2i; Mef2c; Dennd1b; Fcer1g; Vav3; Thy1; Ighv1-74; C3ar1; Pde4d; Clec4n; Ifi205; Ighv5-12-4; Ighv1-58; Ighv3-5; Btl2; Blnk; Fyn; Ighv1-63; Cd79a; Zc3h12a; Hmgb1; Zap70; Aim2; Ighv13-2; Cd19                                                                                                                                                                                                                             |
| myeloid cell homeostasis                            | biological process | 5.20486 | 0.0054898 | 26 | 10 | 28  | 2262  | Ampd3; Mpl; Hmox1; Sh2b3; Nckap1l; Lilrb4a; Ccl2; Traf3ip2; Bcl2l11; Slc15a4                                                                                                                                                                                                                                                                                                                                                                                                                                                                                                                                                                             |
| tolerance induction                                 | biological process | 4.40428 | 0.0122249 | 36 | 5  | 9   | 2507  | Lilr4b; Lyn; Lilrb4a; C3ar1; Tnfaip3                                                                                                                                                                                                                                                                                                                                                                                                                                                                                                                                                                                                                     |

|                  |                       |         |           |    |   |    |       |                                                    |
|------------------|-----------------------|---------|-----------|----|---|----|-------|----------------------------------------------------|
| B cell selection | biological<br>process | 3.95864 | 0.0190891 | 50 | 3 | 3  | 2339  | H2-Ab1; Btk; Traf3ip2                              |
| T cell selection | biological<br>process | 3.88748 | 0.0204969 | 24 | 8 | 25 | 45058 | H2-DMa; Cd74; Ptprc; Ccr7; Spn; Il15; Cd1d1; Zap70 |

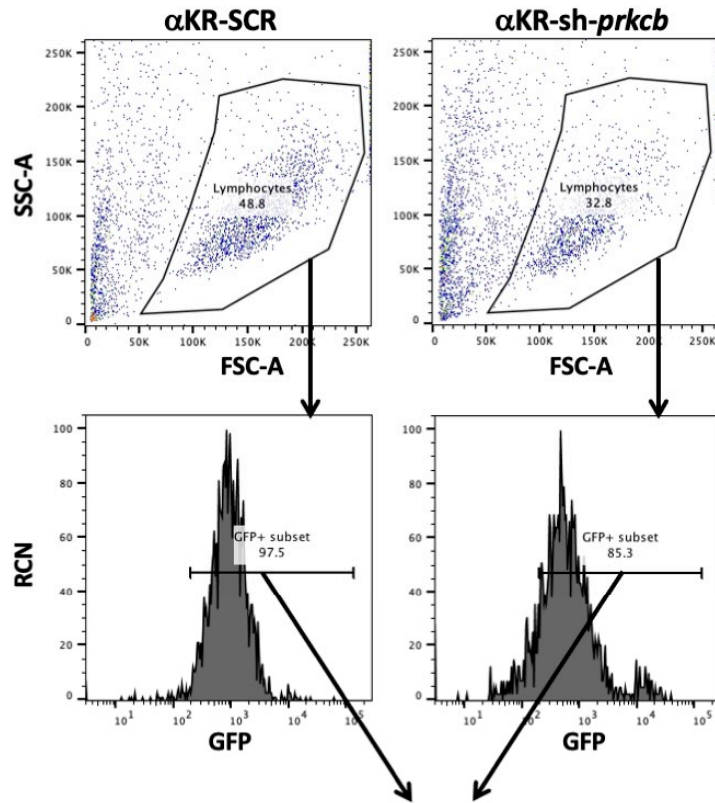

**Histograms generated (Figure 1A)**  
**MFIs calculated (Figure 1B)**

**Supplementary Figure S1: Gating Strategy for cell surface marker expression.**

Knockdown of *prkcb* (or scrambled (SCR) control) was performed in HSPC cells within 24 hr of isolation from the mouse, then these cells were retrovirally transduced with MIEV or PKC $\alpha$ -KR ( $\alpha$ KR) at d7. Cells were co-cultured with OP9 in the presence of cytokines. Phenotypic characterization of the cells was carried out by flow cytometry as shown in Figure 1A. The gated strategy for generating these data is shown here. Initially cells are live/size gated by FSC/SSC to identify the lymphocyte population (top plots). Thereafter the "Lymphocytes" were GFP+ gated and histograms (Figure 1A) and MFIs (Figure 1B) of cell surface markers were generated.

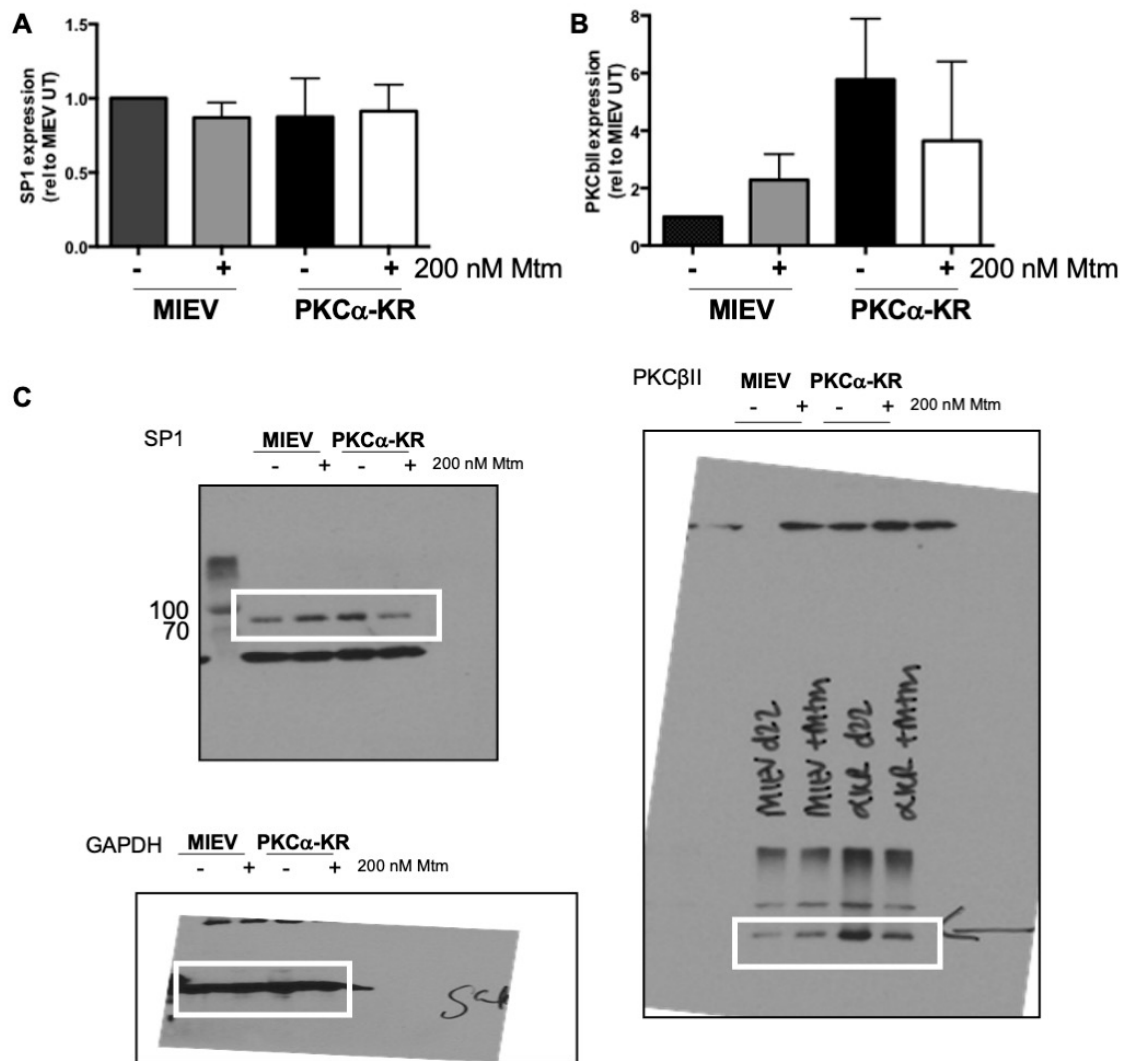

**Supplementary Figure S2: Mithramycin treatment of PKC $\alpha$ -KR cells leads to a slight decrease in PKC $\beta$ II expression.** Protein lysates were prepared from MIEV and PKC $\alpha$ -KR cells that were treated with 200 nM mtm for 12 hr. Western blotting was performed and the resultant blots were probed for PKC $\beta$ II, SP1 and a loading control (GAPDH). Densitometry was performed by normalising the target protein expression to loading control, and then expressed relative to MIEV UT sample in each blot. Densitometry of SP1 (**A**) and PKC $\beta$ II (**B**) shown.  $n=3$  individual experiments were carried out. **C.** The full blots of the representative images shown in Figure 2D.

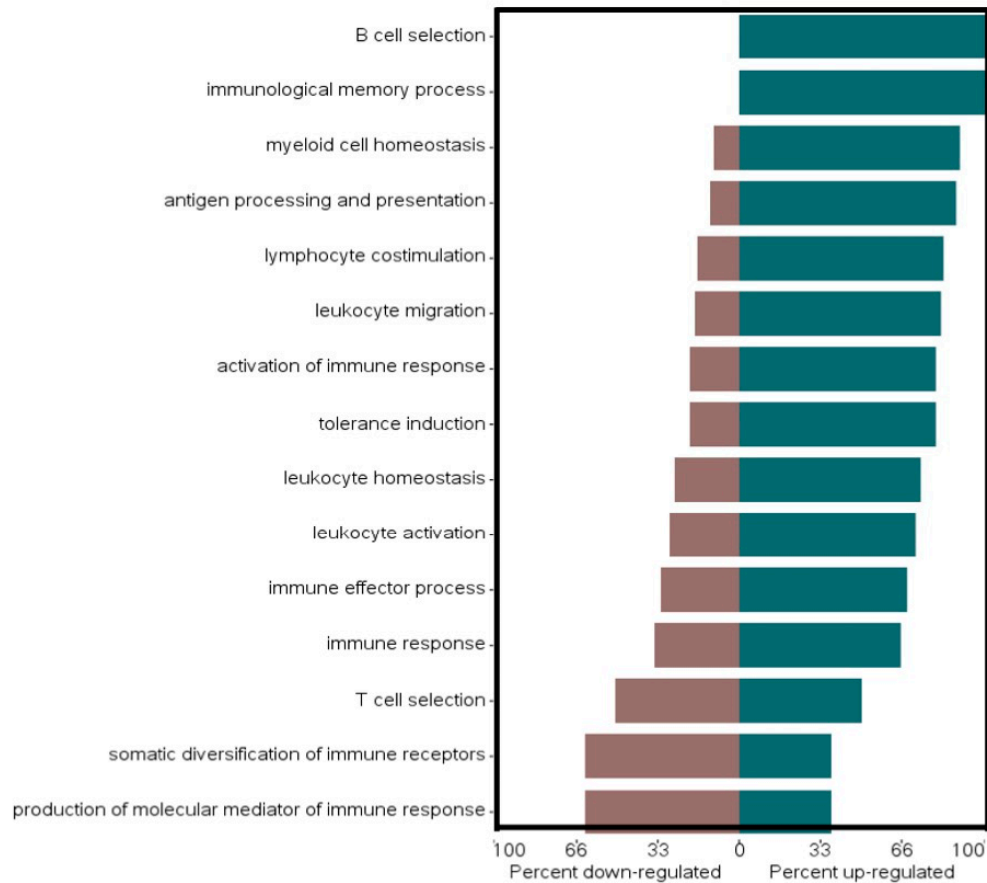

**Supplementary Figure S3: Gene ontology enrichment analysis.**

Gene ontology enrichment analysis identified functional groups with the highest over-representation of genes within the gene list compared to background are shown alongside their respective enrichment score ( $-\log$  p-value of a chi-square test). Percentage of genes within each functional group (FDR < 0.05) that are up- or down-regulated in PKC $\alpha$ -KR vs. MIEV cells.



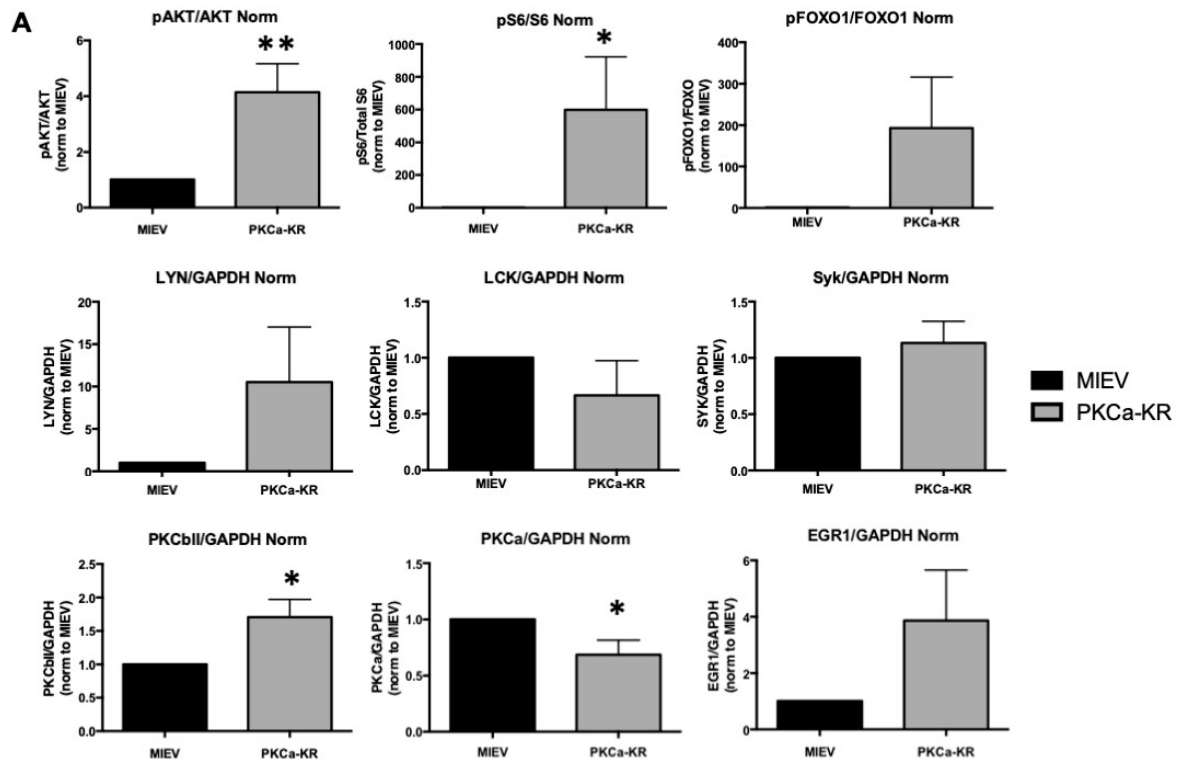

**Supplementary Figure S4: PKC $\alpha$ -KR cells modulate BCR signaling components in a similar manner to primary CLL cells.** Protein lysates were prepared from MIEV (black bars) and PKC $\alpha$ -KR (grey bars) cultures and Western blotting was performed.

**A.** Densitometry was performed by normalising the target protein expression to loading control, and then expressed relative to MIEV sample in each blot, including the images shown in Figure 4A. Unpaired student t tests were used to analyze the data ( $n \geq 3$  individual samples).

**B**

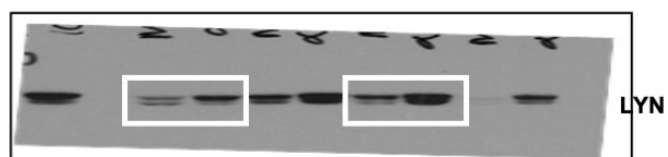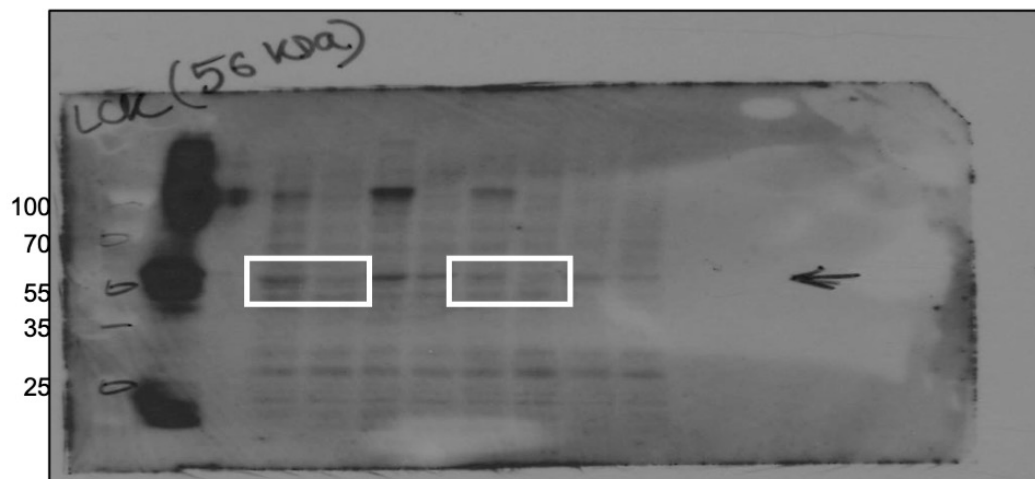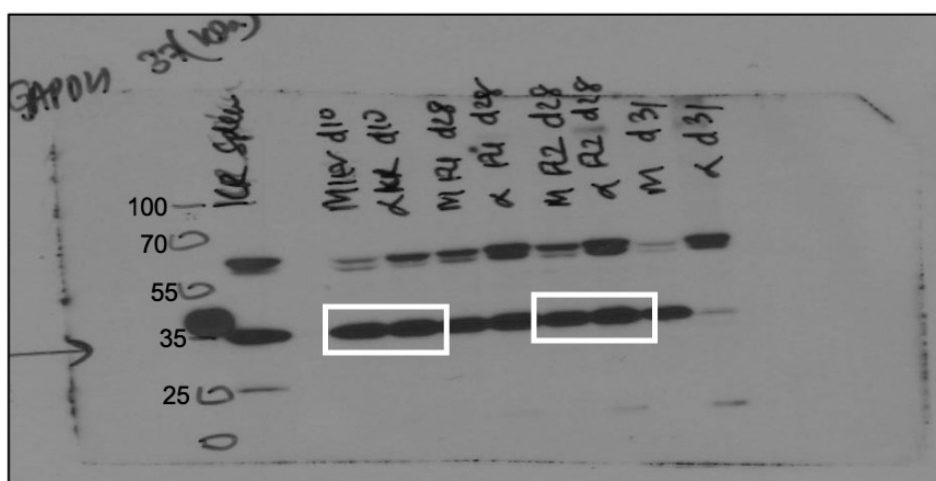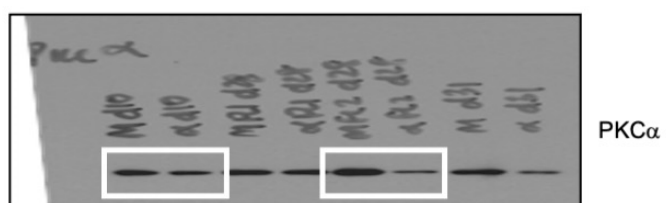

B (cont.)

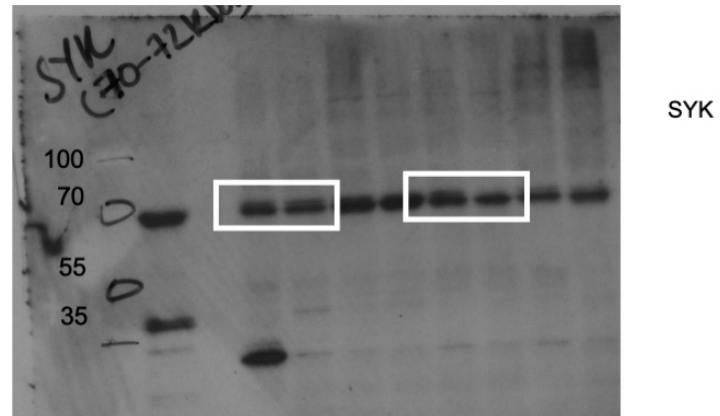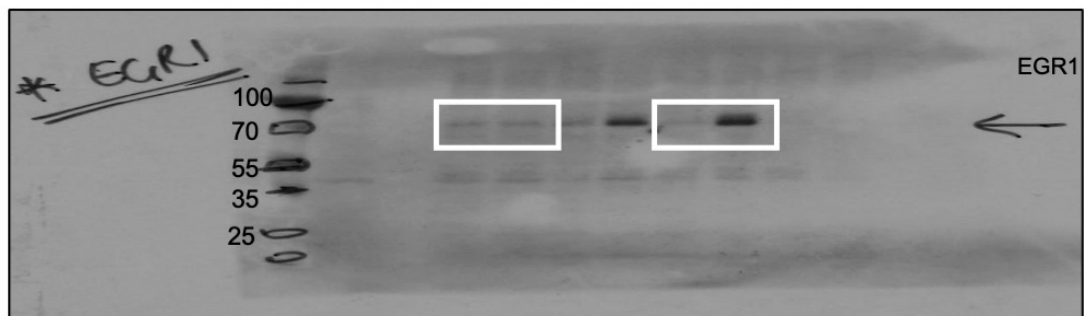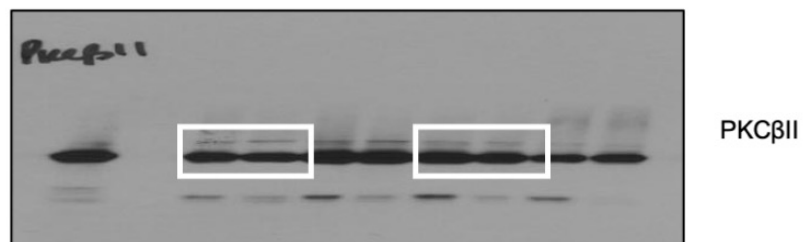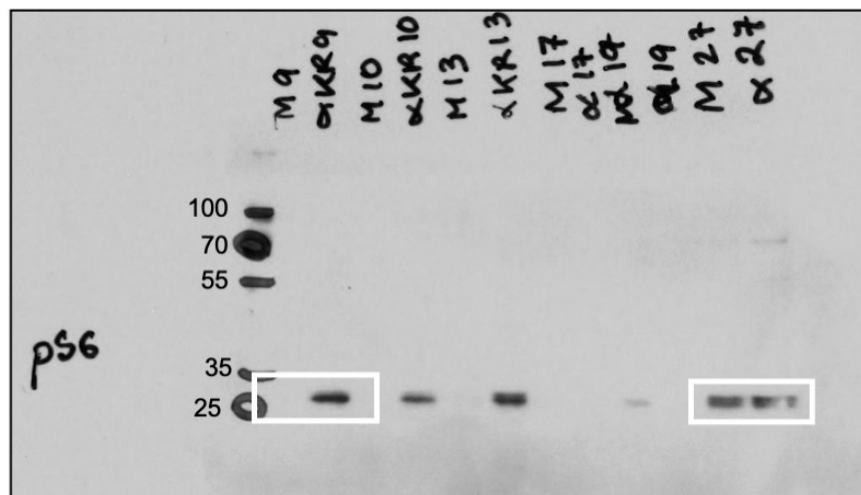

**B (cont.)**

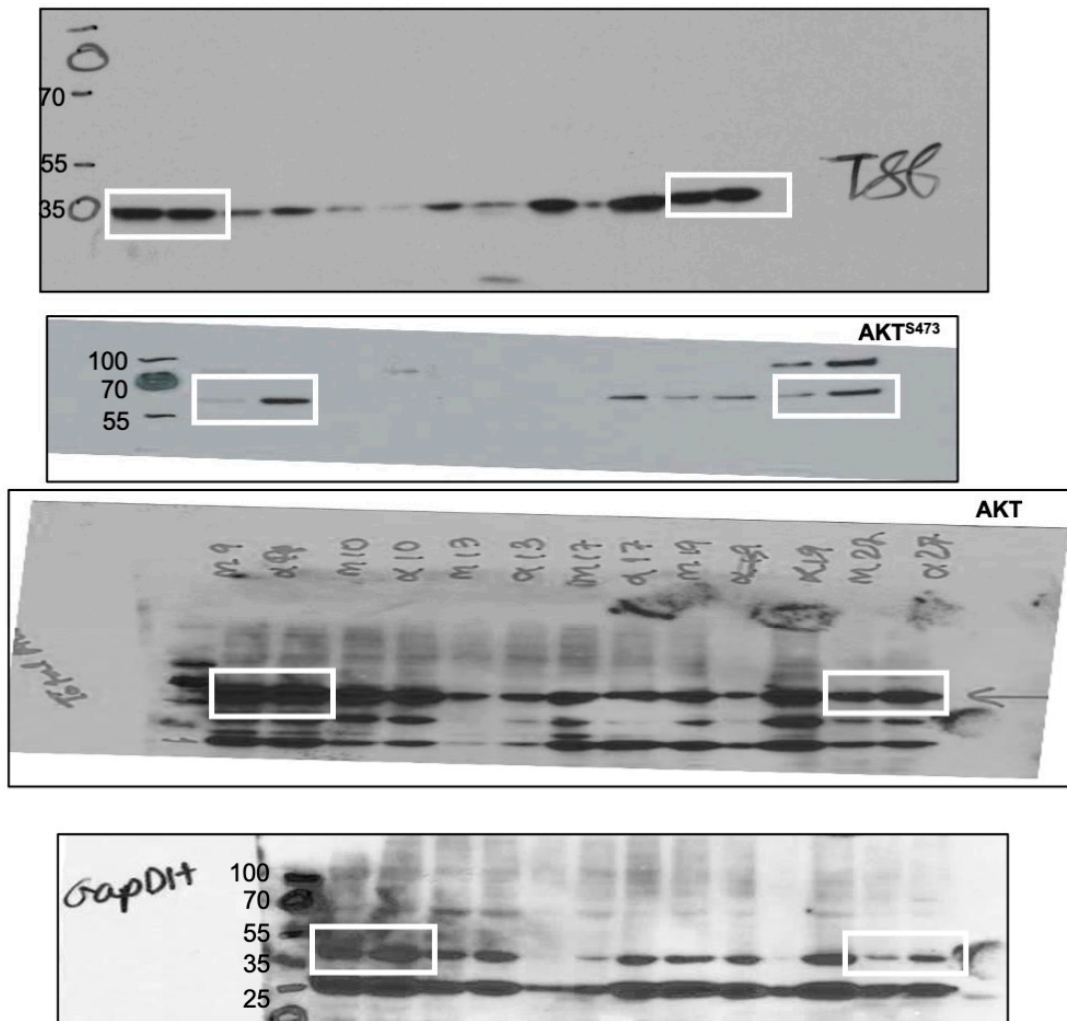

**Supplementary Figure S4: PKC $\alpha$ -KR cells modulate BCR signaling components in a similar manner to primary CLL cells (cont).** Protein lysates were prepared from MIEV (black bars) and PKC $\alpha$ -KR (grey bars) cultures and Western blotting was performed. **B.** Mirror blots (2 – 4 gels) were run of a number of co-cultures to enable probing of the same lysates with multiple antibodies and allowing different biological replicates to be analysed on the same blots. The resultant blots were probed for the indicated target proteins and a loading control (GAPDH) on at least one of the mirror blots. Shown here are the full blots shown in Figure 4A. White boxes on the images identify the portions of the blots shown in the figure.

**A**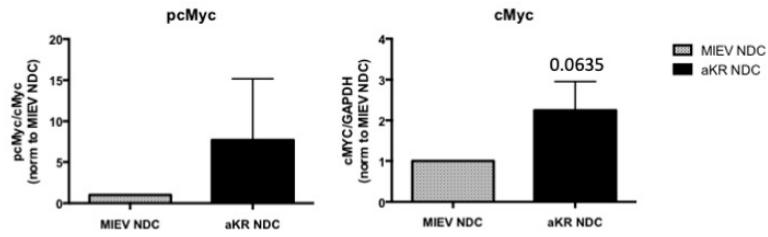**B**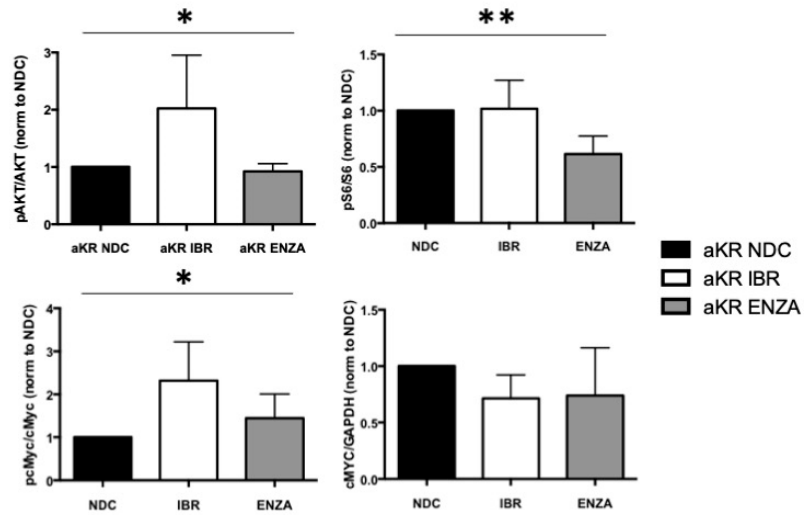

**Supplementary Figure S5: Drug treatments modulate BCR signaling components in CLL-like PKC $\alpha$ -KR cells.** MIEV and PKC $\alpha$ -KR cells were treated with either IB or Enza, or left NDC. Western blots were performed to identify the effect on key proteins within the BCR signalosome as indicated. Densitometry was performed by normalising the target protein expression to loading control, and then expressed relative to MIEV NDC (A) or PKC $\alpha$ -KR NDC (B) in each blot, including the images shown in Figure 4C. Unpaired student t tests (A) or one way ANOVA tests were used to analyze the data ( $n \geq 3$  individual samples).

C

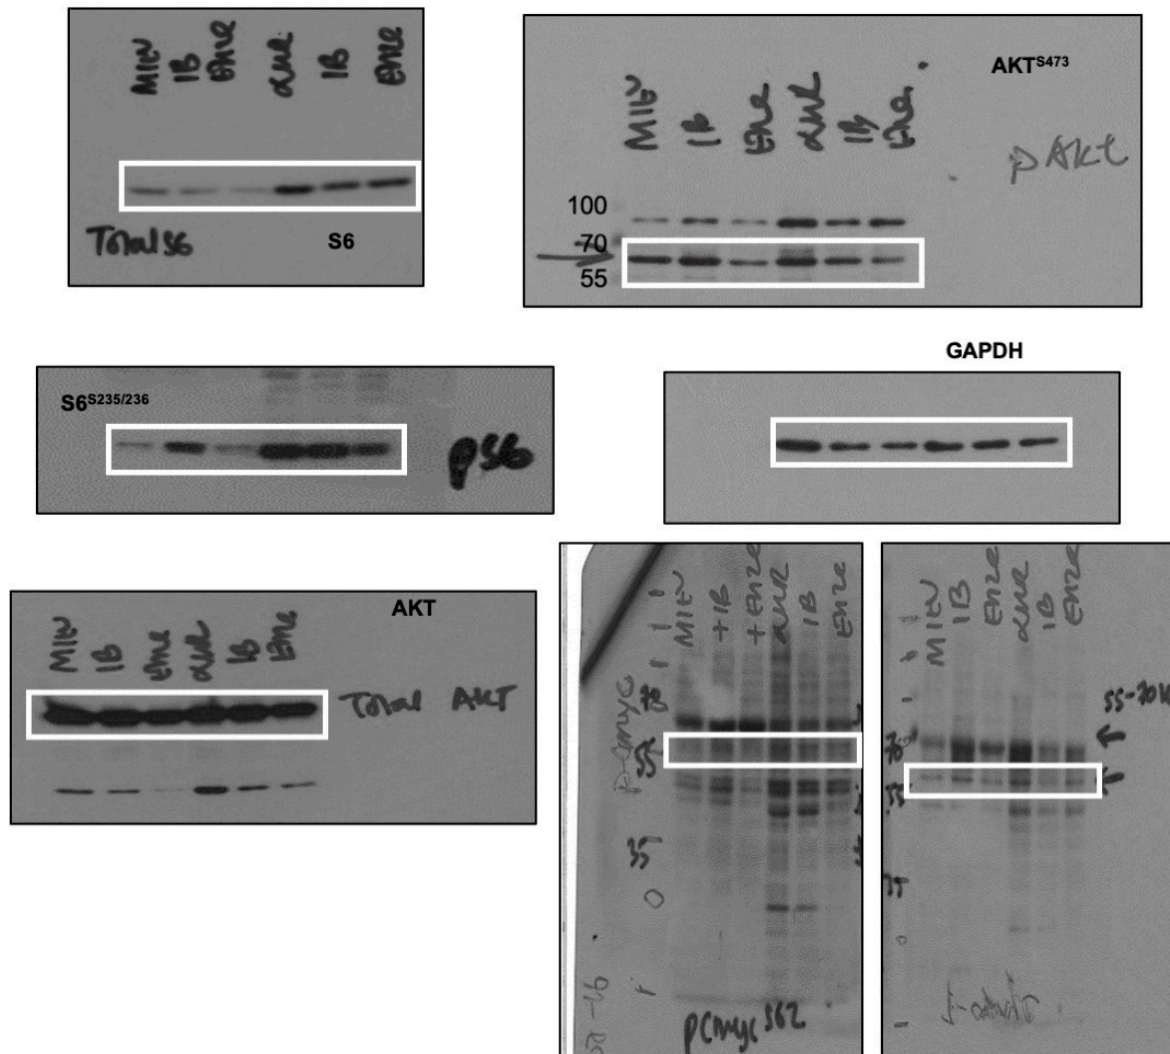

**Supplementary Figure S5: Drug treatments modulate BCR signaling components in CLL-like PKC $\alpha$ -KR cells (cont).** MIEV and PKC $\alpha$ -KR cells were treated with either IB or Enza, or left NDC. Western blots were performed to identify the effect on key proteins within the BCR signalosome as indicated. **C.** Mirror blots (2 – 3 gels) were loaded to enable probing of the same lysates with multiple antibodies, enabling different biological replicates to be analysed on the same blots. The resultant blots were probed for the indicated target proteins and a loading control (GAPDH) on at least one of the mirror blots. Shown here are the full blots shown in Figure 4C. White boxes on the images identify the portions of the blots shown in the figure.

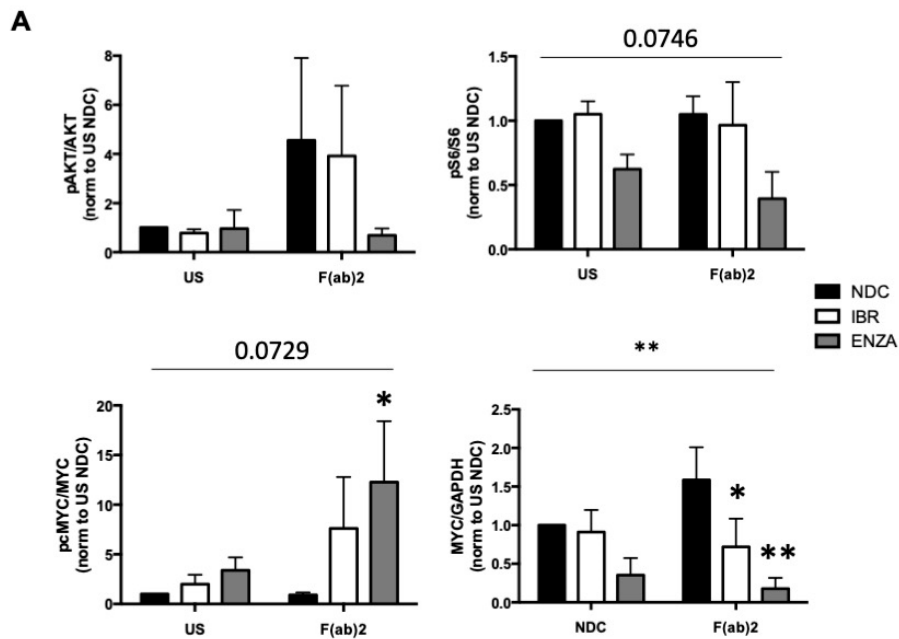

**Supplementary Figure S6: Drug treatments modulate signaling components in BCR-crosslinked primary CLL samples.** Human CLL cells were treated with 1  $\mu$ M IB or 10  $\mu$ M Enza in the presence or absence of BCR crosslinking (BCR-XL; F(ab')<sub>2</sub> fragment stimulation). Protein lysates were then prepared for Western blotting. **A.** Densitometry was performed by normalising the target protein expression to loading control, and then expressed relative to US NDC sample in each blot, including the images shown in Figure 5B. Data represents an average of n=3-6 individual patient samples. A two-way ANOVA test was used to analyze the data, with multiple comparisons.

**B**

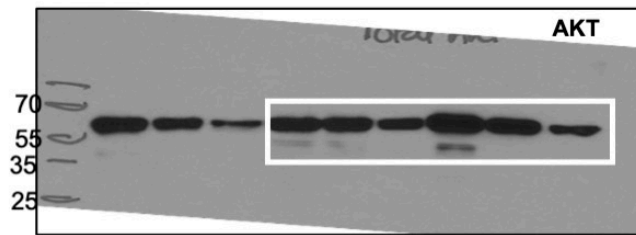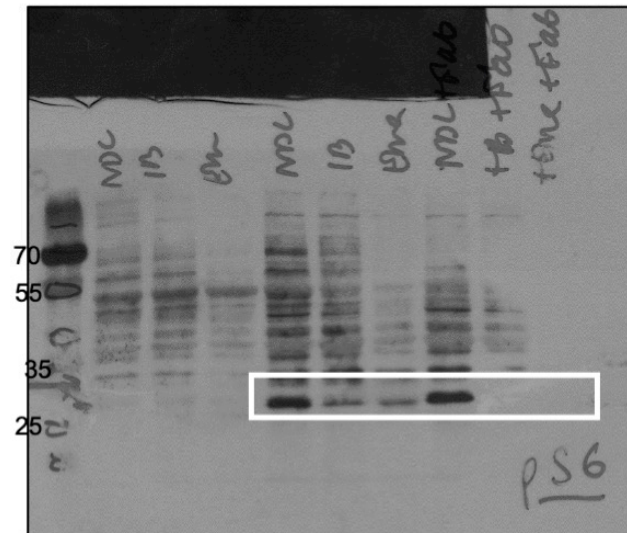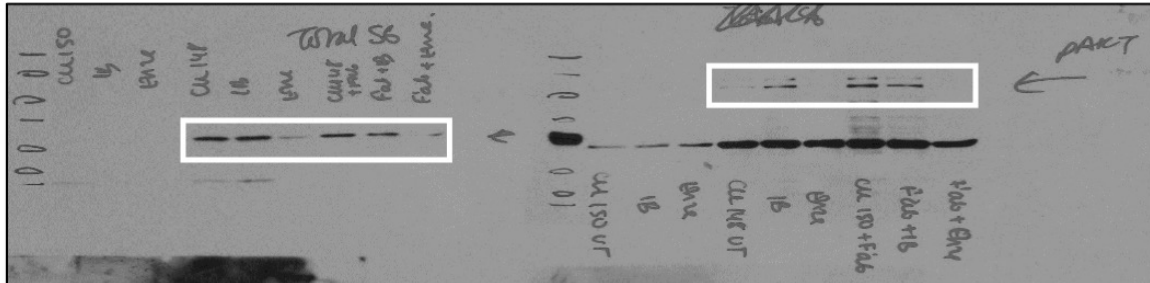



**B (cont).**

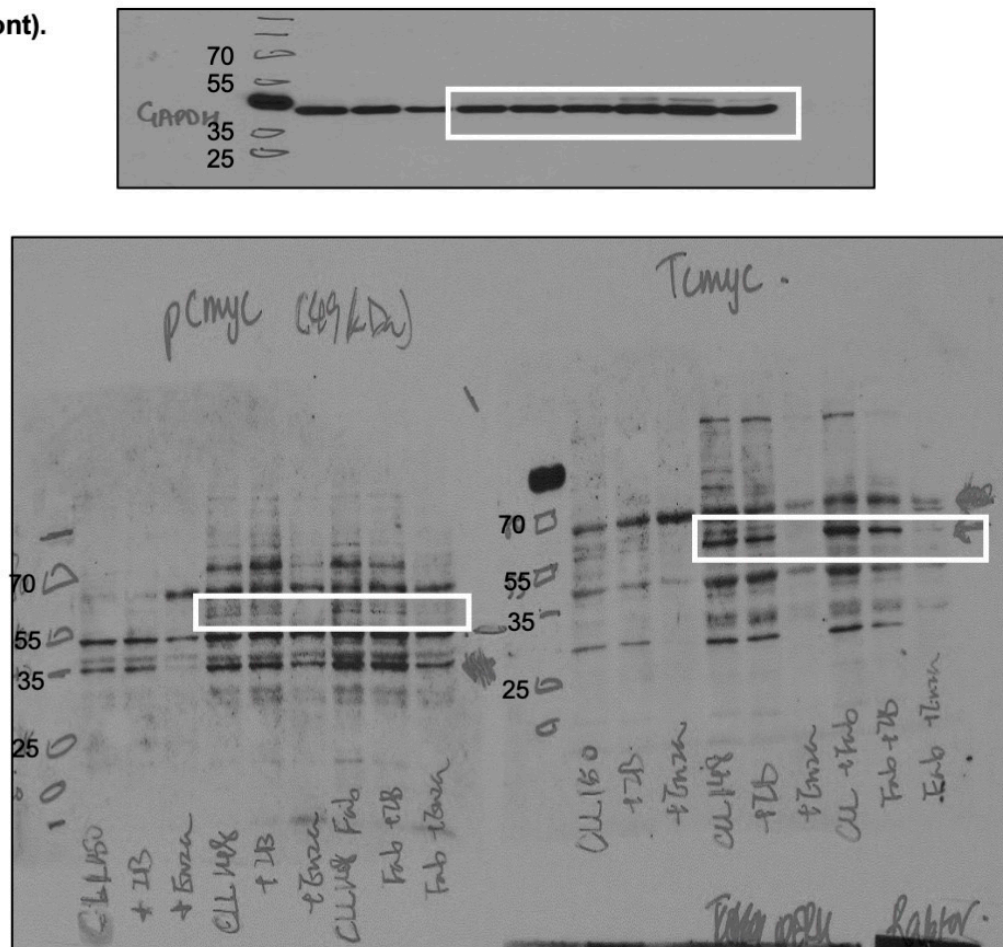

**Supplementary Figure S6: Drug treatments modulate signaling components in BCR-crosslinked primary CLL samples.** Human CLL cells were treated with 1  $\mu$ M IB or 10  $\mu$ M Enza in the presence or absence of BCR crosslinking (BCR-XL; F(ab')<sub>2</sub> fragment stimulation). Protein lysates were then prepared for Western blotting. **B.** Mirror blots (2 – 3 gels) were loaded to enable probing of the same lysates with multiple antibodies, enabling different biological replicates to be analysed on the same blots. The resultant blots were probed for the indicated target proteins and a loading control (GAPDH) on at least one of the mirror blots. Shown here are the full blots shown in Figure 5B. White boxes on the images identify the portions of the blots shown in the figure.

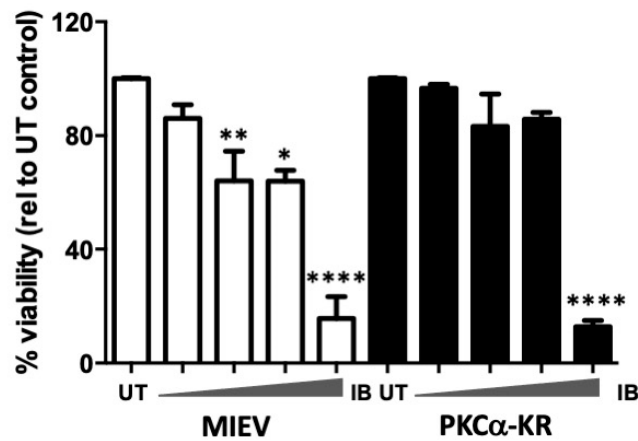

**Supplementary Figure S7: The effect of ibrutinib treatment on the viability of PKC $\alpha$ -KR-CLL-like cells.** Late co-culture MIEV and PKC $\alpha$ -KR cells ( $2 \times 10^6$ ) were cultured for 48 hr in the presence (100 nM – 10  $\mu$ M) or absence (UT) of increasing concentrations of IB. 10  $\mu$ M IB is above the clinically-achievable dose and effects at this concentration will likely be due to off-target effects. Viability data was generated using flow cytometry and gating on AnnV<sup>+</sup>7AAD<sup>-</sup> cells and expressing the percentages relative to UT cells for MIEV and PKC $\alpha$ -KR cultures ( $n \geq 3$  individual experiments).

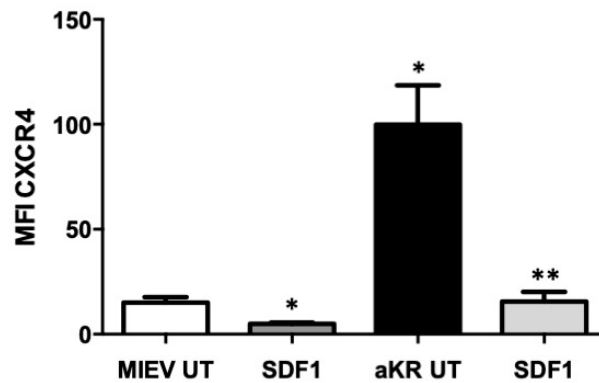

**Supplementary Figure S8: Expression of CXCR4 on the surface of hematopoietic co-cultures.** Late co-cultures MIEV and PKC $\alpha$ -KR cells ( $2 \times 10^6$ ) were incubated in the presence or absence of CXCL12 (SDF1) for 4 hr, replicating the conditions of the migration assay, and then stained with anti-CXCR4 antibody and analyzed by flow cytometry. Cells were live/size gated and B cells were identified by B220<sup>+</sup> expression. Results show the MFI of CXCR4 staining on cells ( $n \geq 3$  individual experiments).

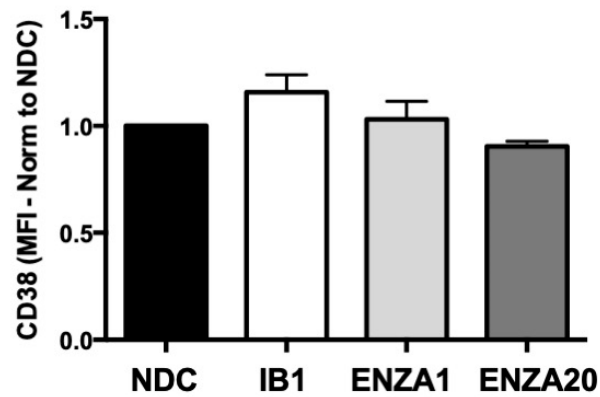

**Supplementary Figure S9: The surface expression of adhesion marker CD38 was unaffected by drug treatments.** Late co-culture MIEV and PKC $\alpha$ -KR cells ( $2 \times 10^6$ ) were cultured for 24 hr in the presence of 1  $\mu$ M IB or 1 or 10 Enza or left untreated (NDC). The intensity of CD38 surface expression was then determined by flow cytometry. Data was live and size gated and the mean fluorescence intensity (MFI) was determined. Values are normalized to NDC as an average of three individual experiments. One way ANOVA tests were used to determine the significance of the changes in surface expression and no significant changes were found.
